# Supplementary material
Source: HighWire-hosted journal article supplement (https://thorax.bmj.com/content/75/9/805)
Supplement: inline-supplementary-material-1 [file inline-supplementary-material-1.pdf]

**Supplementary Table 1. Conversion table for face mask with reservoir**

| Oxygen flow (L/min) | Estimated FiO <sub>2</sub> (%) |
|---------------------|--------------------------------|
| 6                   | 60                             |
| 7                   | 70                             |
| 8                   | 80                             |
| 9                   | 90                             |
| 10                  | 95                             |
